# Supplementary material for: MXene nanosheet-reinforced chitosan as a stable photothermal evaporator for efficient solar evaporation
Source: Royal Society of Chemistry journal article supplement (doi:10.1039/d4se00617h), 2024-01-01
Supplement: d4se00617h1.pdf [file d4se00617h1.pdf]

# MXene nanosheets-reinforced chitosan as a stable photothermal evaporator for efficient solar evaporation

*Fuqiang Zhang<sup>a,b</sup>, Zhiqiang Qi<sup>a,b</sup>, Xiangsheng Han<sup>a,b</sup>, Hongzhen Cai<sup>a,b</sup>, Keyan Yang<sup>\*a,b</sup>,*

<sup>a</sup>School of Agricultural Engineering and Food Science, Shandong University of Technology, Zibo, 255000, China

<sup>b</sup>Institute of new bio-based materials, Shandong University of Technology, Zibo, 255000, China

\*Corresponding author. E-mail address: yangkeyan@sdut.edu.cn (K. Yang)

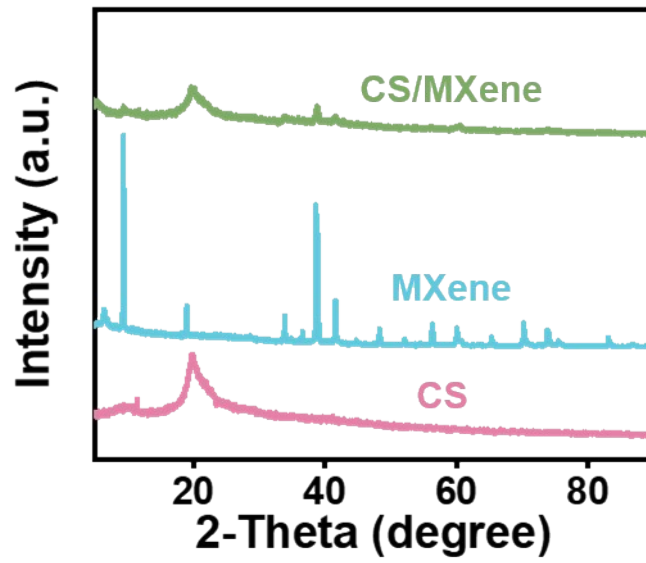

Fig.S1 XRD spectra of MXene, CS, and CS/MXene aerogels.

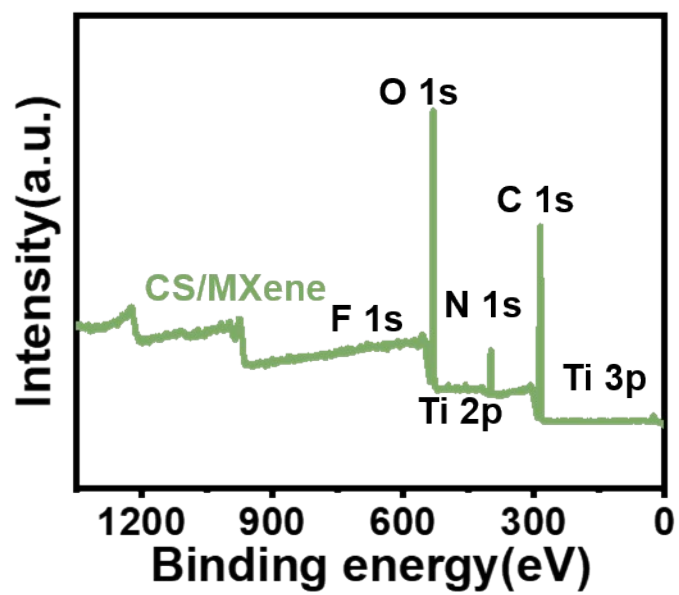

Fig.S2 XPS mapping of CS/MXene aerogel.

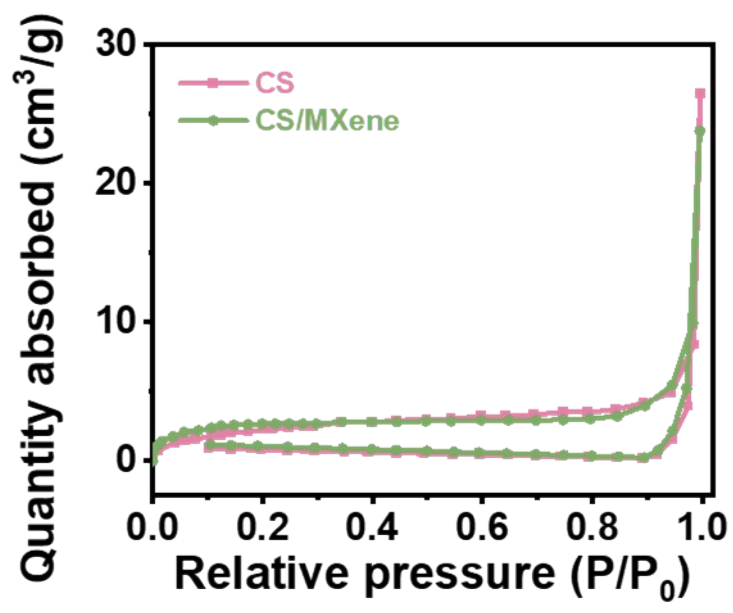

Fig.S3 BET test results for CS and CS/MXene aerogels.

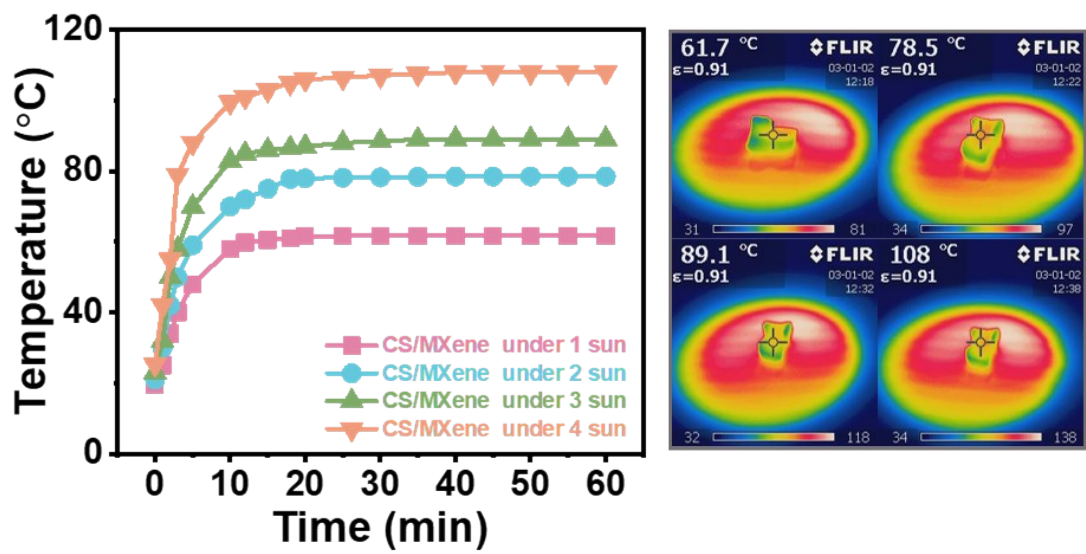

Fig.S4 Temperature and infrared images of dry state CS/MXene aerogel at different light intensities.

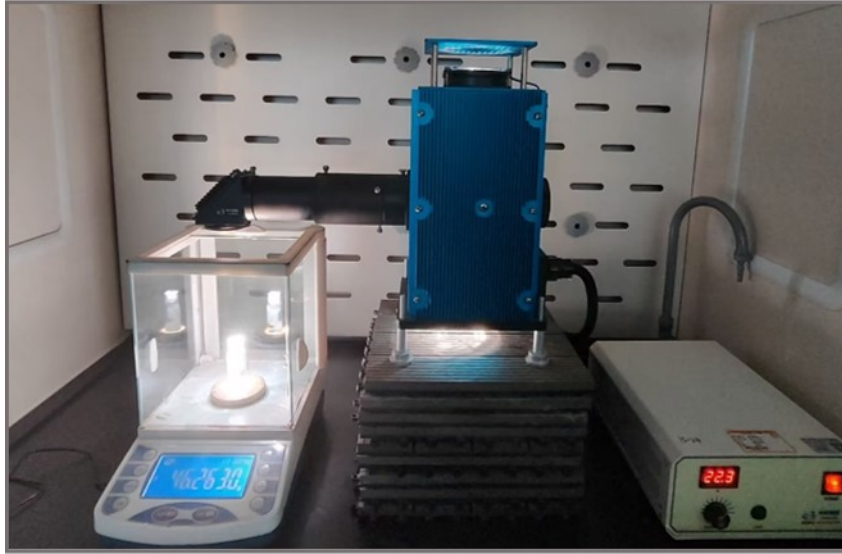

**Fig.S5** Actual diagram of a solar-powered evaporation measurement device.

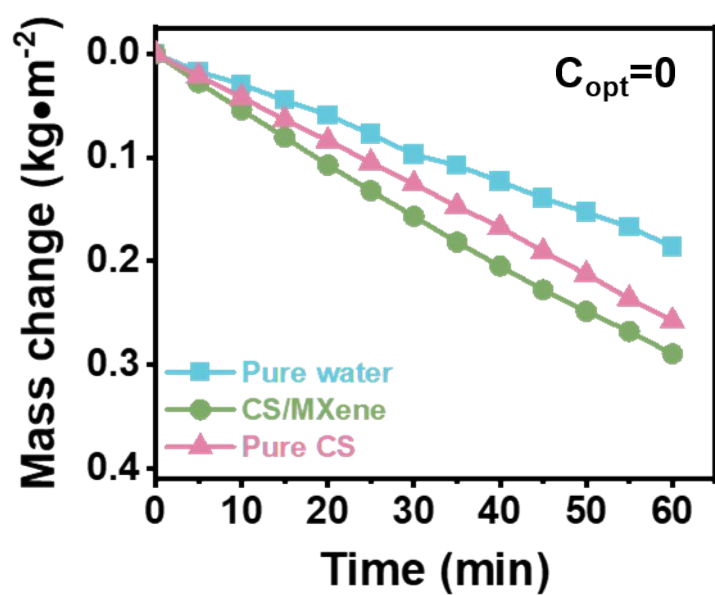

**Fig.S6** Evaporation Rate of Pure Water, CS,CS/MXene in Dark Environment.

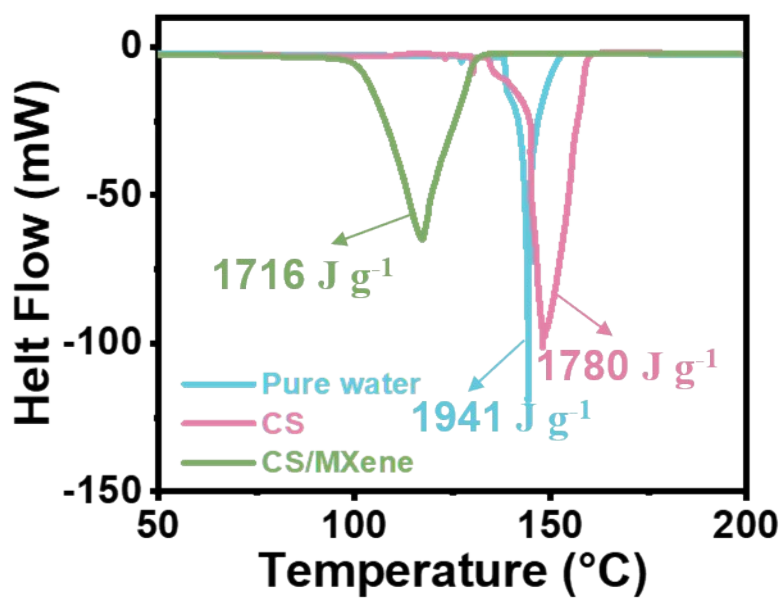

Fig.S7 DSC curves for pure water, CS and CS/MXene aerogels. All tests were performed from room temperature to 200°C under nitrogen (5°C min<sup>-1</sup> rate).



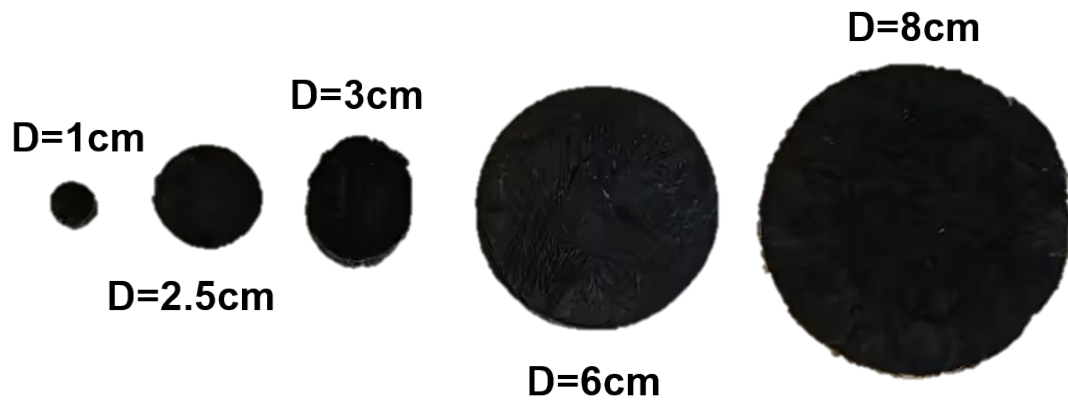

**D:Diameter**

**Fig.S8 Evaporators of different diameters.**

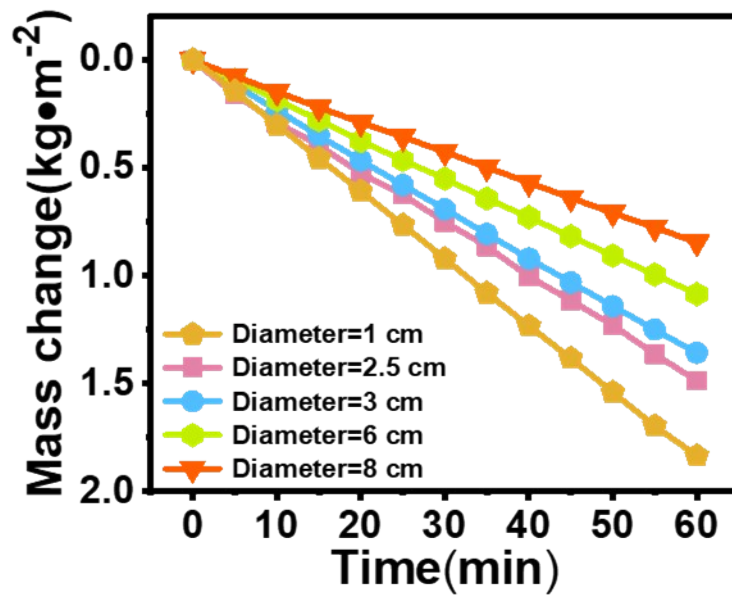

Fig. S9 Evaporation rates of evaporators of different diameters.

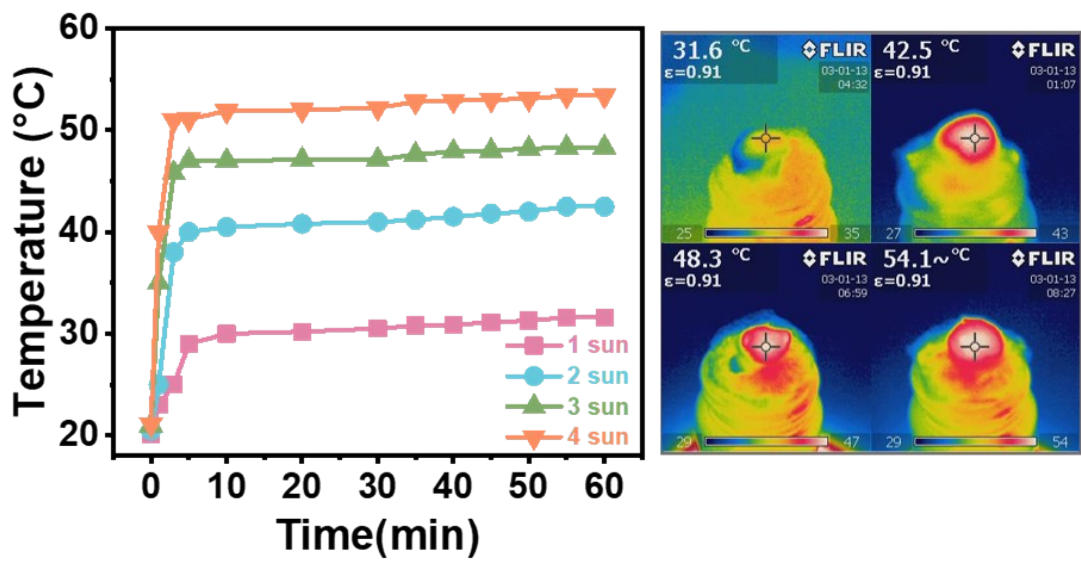

Fig.S10 Temperature and infrared images of CS/MXene aerogel in the wet state at different light intensities.

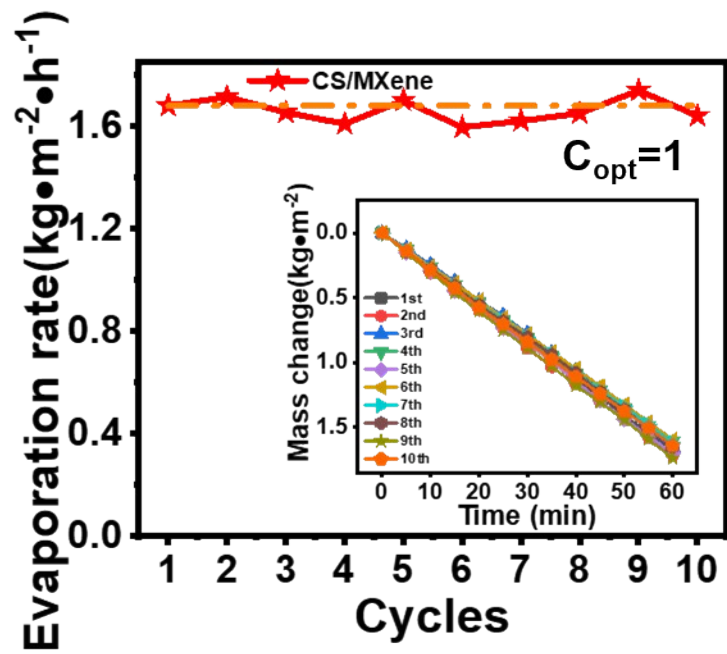

Fig. 11 Cycling stability of CS/MXene aerogel evaporator in seawater.

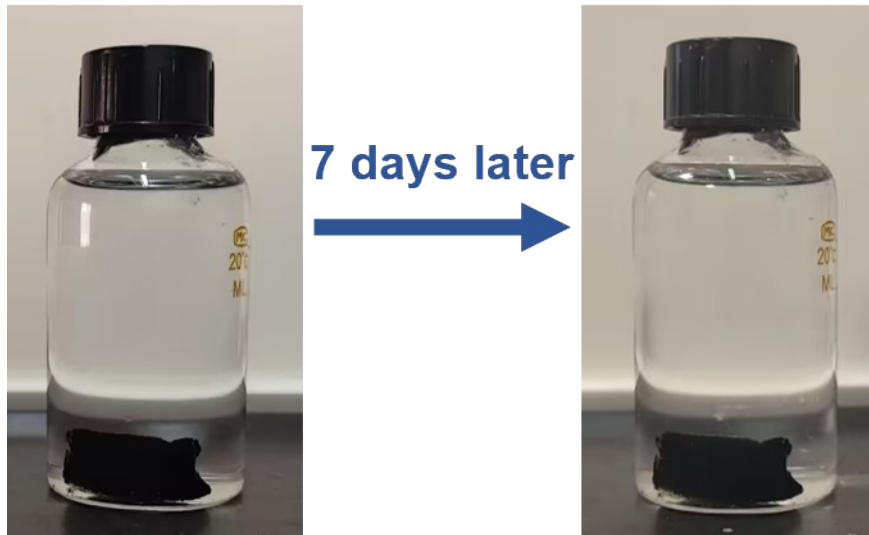

**Fig.12** Comparison of the evaporator before and after 7 days of immersion in seawater.

**Table S1.** Porous properties of CS and CS/MXene aerogels.

|                 | <b>Surface area (m<sup>2</sup> /g)</b> | <b>Pore size (nm)</b> |
|-----------------|----------------------------------------|-----------------------|
| <b>Pure CS</b>  | <b>8.2702</b>                          | <b>12.4302</b>        |
| <b>CS/MXene</b> | <b>10.4922</b>                         | <b>10.4077</b>        |
